# Supplementary material for: Cost-Effectiveness of an Antibacterial Envelope for Cardiac Implantable Electronic Device Infection Prevention in the US Healthcare System From the WRAP-IT Trial
Source: PubMed Central journal article supplement — Circ Arrhythm Electrophysiol. 2020 Sep 11;13(10):e008503. doi: 10.1161/CIRCEP.120.008503 (PMC7566304; doi:10.1161/circep.120.008503), 2020-09-11
Supplement: hae-13-e008503-s001.pdf [file hae-13-e008503-s001.pdf]

## SUPPLEMENTAL MATERIAL

### Supplemental Figure

**Figure S1. Infection Treatment Cost by Treatment Intensity.** The model accounts for different treatment intensities in the decision tree, so the hospital cost data from WRAP-IT were analyzed with these intensities in mind, using the same method as the WRAP-IT impact of infection manuscript.<sup>1</sup>

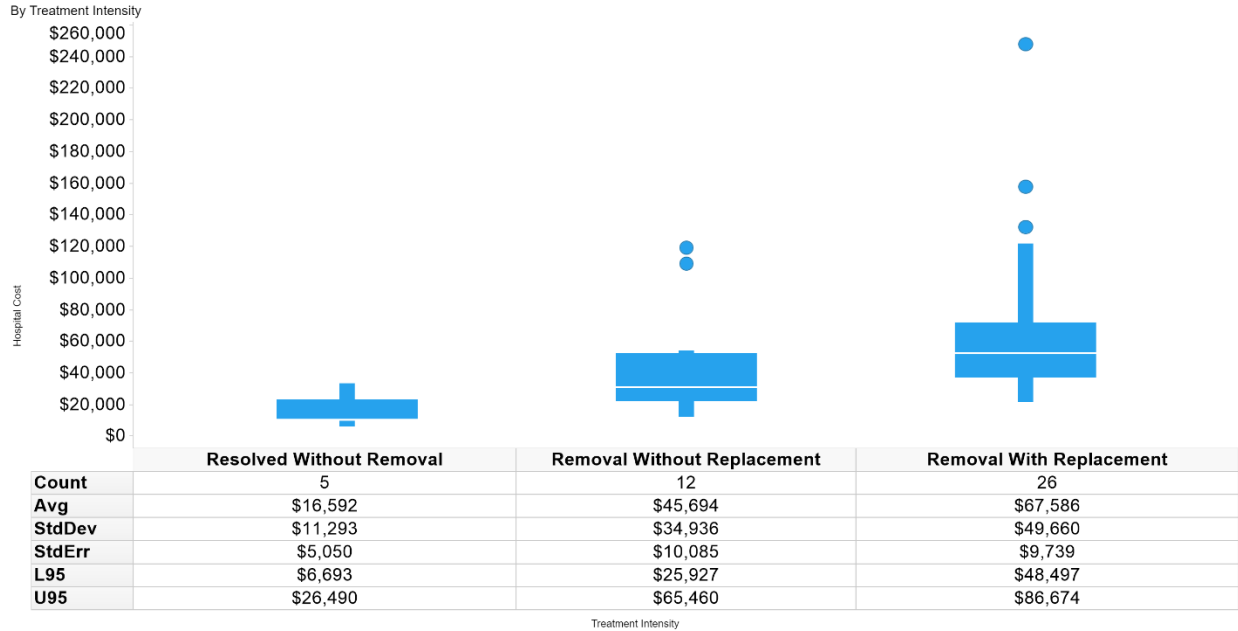

<sup>1</sup> Wilkoff BL, Boriani G, Mittal S, Poole JE, Kennergren C, Corey R, Love J, Augustini R, Faerstrand S, Wiggins SS, et al. Impact of Cardiac Implantable Electronic Device Infection: A Clinical and Economic Analysis of the WRAP-IT Trial. *Circ Arrhythm Electrophysiol.* 2020. DOI:10.1161/CIRCEP.119.008280

## Supplemental Tables

**Table S1. Mortality at 12 Months by Infection Status and Treatment Intensity** - The model accounts for different treatment intensities in the decision tree, so the mortality data from WRAP-IT were analyzed with these intensities in mind, using the same method as the WRAP-IT impact of infection manuscript.<sup>1</sup>

| Infection Status and Treatment Intensity | Number of Deaths (K-M Mortality Rate, Standard Error) at 1 Year | Number at Risk at Day 365 |
|------------------------------------------|-----------------------------------------------------------------|---------------------------|
| Infection and Complete Extraction        | 7 (14.6%, 5.1%)                                                 | 37                        |
| Infection and No Extraction*             | 3 (23.8%, 12.1%**)                                              | 9                         |
| No Infection                             | 348 (5.2%, 0.3%)                                                | 3                         |

\* Patients treated with partial extraction were assumed to have same mortality risk as those with no extraction, as part of the infected system was still present after treatment.  
\*\* Standard error resulted in 95% confidence interval extending to negative numbers, so standard error was adjusted to be 10% of the mean value in analysis.

**Table S2. Long-Term Life Expectancy and Heart Failure Hospitalizations by CIED Type** - The model assigns a lumped value for quality adjusted life years (QALYs) and cost at the 12-month time point after the decision tree portion of the model is complete. To do this, we created estimates of life expectancy and heart failure (HF) hospitalizations expected for patients with each device type by creating weighted averages of the individual patient types detailed in Mealing *et al.*<sup>2</sup> in the supplement tables S10-S13 (Weights for each patient type were found for the same dataset in Woods *et al.*<sup>3</sup> Table 1).

| <u>Mealing et al. Tables S10-S13</u> | <u>QRS Duration</u> | <u>LBBB</u> | <u>NYHA Class</u> | <u>Median Survival (yrs)</u> | Mean Survival Per NYHA | Average per LBBB Weighted by NYHA | Therapy Final Average Weighted by LBBB | <u>Average HF Hosp. (lifetime)</u> | Average Hosp. Per NYHA | Average per LBBB Weighted by NYHA | Therapy Final Average Weighted by LBBB |
|--------------------------------------|---------------------|-------------|-------------------|------------------------------|------------------------|-----------------------------------|----------------------------------------|------------------------------------|------------------------|-----------------------------------|----------------------------------------|
| No CIED                              | <120ms              | No          | I                 | 8.96                         |                        |                                   |                                        | 1.58                               |                        |                                   |                                        |
| No CIED                              | 120-150ms           | No          | I                 | 6.37                         |                        |                                   |                                        | 1.44                               |                        |                                   |                                        |
| No CIED                              | ≥150ms              | No          | I                 | 6.06                         | 7.13                   |                                   |                                        | 1.19                               | 1.40                   |                                   |                                        |
| No CIED                              | <120ms              | No          | II                | 10.61                        |                        |                                   |                                        | 1.78                               |                        |                                   |                                        |
| No CIED                              | 120-150ms           | No          | II                | 7                            |                        |                                   |                                        | 1.54                               |                        |                                   |                                        |
| No CIED                              | ≥150ms              | No          | II                | 6.66                         | 8.09                   |                                   |                                        | 1.28                               | 1.53                   |                                   |                                        |
| No CIED                              | <120ms              | No          | III               | 5.78                         |                        |                                   |                                        | 2.14                               |                        |                                   |                                        |
| No CIED                              | 120-150ms           | No          | III               | 4.08                         |                        |                                   |                                        | 1.91                               |                        |                                   |                                        |
| No CIED                              | ≥150ms              | No          | III               | 3.58                         | 4.48                   |                                   |                                        | 1.49                               | 1.85                   |                                   |                                        |
| No CIED                              | <120ms              | No          | IV                | 2.32                         |                        |                                   |                                        | 1.94                               |                        |                                   |                                        |
| No CIED                              | 120-150ms           | No          | IV                | 2.02                         |                        |                                   |                                        | 2.03                               |                        |                                   |                                        |
| No CIED                              | ≥150ms              | No          | IV                | 1.82                         | 2.05                   | 6.23                              |                                        | 1.59                               | 1.85                   | 1.67                              |                                        |
| No CIED                              | 120-150ms           | Yes         | I                 | 7.23                         |                        |                                   |                                        | 1.58                               |                        |                                   |                                        |
| No CIED                              | ≥150ms              | Yes         | I                 | 6.56                         | 6.90                   |                                   |                                        | 1.27                               | 1.43                   |                                   |                                        |
| No CIED                              | 120-150ms           | Yes         | II                | 7.82                         |                        |                                   |                                        | 1.66                               |                        |                                   |                                        |
| No CIED                              | ≥150ms              | Yes         | II                | 7.9                          | 7.86                   |                                   |                                        | 1.45                               | 1.56                   |                                   |                                        |

<sup>2</sup> Mealing S, Woods B, Hawkins N, Cowie MR, Plummer CJ, Abraham WT, Beshai JF, Klein H and Sculpher M. Cost-effectiveness of implantable cardiac devices in patients with systolic heart failure. *Heart*. 2016;102:1742-1749. DOI: 10.1136/heartjnl-2015-308883.

<sup>3</sup> Woods B, Hawkins N, Mealing S, Sutton A, Abraham WT, Beshai JF, Klein H, Sculpher M, Plummer CJ, Cowie MR. Individual patient data network meta-analysis of mortality effects of implantable cardiac devices. *Heart*. 2015;101:1800-1806. DOI: 10.1136/heartjnl-2015-307634.

|         |           |     |     |       |       |      |      |      |      |      |      |
|---------|-----------|-----|-----|-------|-------|------|------|------|------|------|------|
| No CIED | 120-150ms | Yes | III | 4.19  |       |      |      | 1.94 |      |      |      |
| No CIED | ≥150ms    | Yes | III | 4.2   | 4.20  |      |      | 1.68 | 1.81 |      |      |
| No CIED | 120-150ms | Yes | IV  | 2.16  |       |      |      | 2.1  |      |      |      |
| No CIED | ≥150ms    | Yes | IV  | 2.03  | 2.10  | 5.99 | 6.14 | 1.73 | 1.92 | 1.67 | 1.67 |
| ICD     | <120ms    | No  | I   | 11.08 |       |      |      | 1.47 |      |      |      |
| ICD     | 120-150ms | No  | I   | 9.25  |       |      |      | 1.52 |      |      |      |
| ICD     | ≥150ms    | No  | I   | 8.06  | 9.46  |      |      | 1.19 | 1.39 |      |      |
| ICD     | <120ms    | No  | II  | 12.83 |       |      |      | 1.63 |      |      |      |
| ICD     | 120-150ms | No  | II  | 9.9   |       |      |      | 1.59 |      |      |      |
| ICD     | ≥150ms    | No  | II  | 8.86  | 10.53 |      |      | 1.27 | 1.50 |      |      |
| ICD     | <120ms    | No  | III | 7.32  |       |      |      | 2.05 |      |      |      |
| ICD     | 120-150ms | No  | III | 6     |       |      |      | 2.1  |      |      |      |
| ICD     | ≥150ms    | No  | III | 4.89  | 6.07  | 9.28 |      | 1.55 | 1.9  | 1.59 |      |
| ICD     | 120-150ms | Yes | I   | 9.48  |       |      |      | 1.55 |      |      |      |
| ICD     | ≥150ms    | Yes | I   | 8.12  | 8.80  |      |      | 1.2  | 1.38 |      |      |
| ICD     | 120-150ms | Yes | II  | 10.05 |       |      |      | 1.6  |      |      |      |
| ICD     | ≥150ms    | Yes | II  | 9.6   | 9.83  |      |      | 1.33 | 1.47 |      |      |
| ICD     | 120-150ms | Yes | III | 5.61  |       |      |      | 1.98 |      |      |      |
| ICD     | ≥150ms    | Yes | III | 5.11  | 5.36  | 8.57 | 9.01 | 1.58 | 1.78 | 1.53 | 1.57 |
| CRT-P   | 120-150ms | No  | III | 4.29  |       |      |      | 1.35 |      |      |      |
| CRT-P   | ≥150ms    | No  | III | 4.31  | 4.30  |      |      | 1.19 | 1.27 |      |      |
| CRT-P   | 120-150ms | No  | IV  | 2.21  |       |      |      | 1.33 |      |      |      |
| CRT-P   | ≥150ms    | No  | IV  | 2.27  | 2.24  | 4.10 |      | 1.18 | 1.26 | 1.27 |      |
| CRT-P   | 120-150ms | Yes | III | 5.05  |       |      |      | 1.54 |      |      |      |
| CRT-P   | ≥150ms    | Yes | III | 5.82  | 5.44  |      |      | 1.5  | 1.52 |      |      |
| CRT-P   | 120-150ms | Yes | IV  | 2.67  |       |      |      | 1.54 |      |      |      |
| CRT-P   | ≥150ms    | Yes | IV  | 2.9   | 2.79  | 5.18 | 4.51 | 1.45 | 1.50 | 1.52 | 1.36 |
| CRT-D   | 120-150ms | No  | I   | 8.37  |       |      |      | 1.24 |      |      |      |
| CRT-D   | ≥150ms    | No  | I   | 8.71  | 8.54  |      |      | 1.1  | 1.17 |      |      |
| CRT-D   | 120-150ms | No  | II  | 9.15  |       |      |      | 1.31 |      |      |      |
| CRT-D   | ≥150ms    | No  | II  | 9.48  | 9.32  |      |      | 1.16 | 1.24 |      |      |

|                  |           |     |     |       |       |      |      |      |      |      |      |
|------------------|-----------|-----|-----|-------|-------|------|------|------|------|------|------|
| CRT-D            | 120-150ms | No  | III | 5.52  |       |      |      | 1.72 |      |      |      |
| CRT-D            | ≥150ms    | No  | III | 5.36  | 5.44  |      |      | 1.46 | 1.59 |      |      |
| CRT-D            | 120-150ms | No  | IV  | 2.86  |       |      |      | 1.95 |      |      |      |
| CRT-D            | ≥150ms    | No  | IV  | 2.81  | 2.84  | 7.84 |      | 1.68 | 1.82 | 1.36 |      |
| CRT-D            | 120-150ms | Yes | I   | 10.18 |       |      |      | 1.42 |      |      |      |
| CRT-D            | ≥150ms    | Yes | I   | 10.18 | 10.18 |      |      | 1.23 | 1.33 |      |      |
| CRT-D            | 120-150ms | Yes | II  | 10.99 |       |      |      | 1.49 |      |      |      |
| CRT-D            | ≥150ms    | Yes | II  | 11.85 | 11.42 |      |      | 1.35 | 1.42 |      |      |
| CRT-D            | 120-150ms | Yes | III | 6.32  |       |      |      | 1.9  |      |      |      |
| CRT-D            | ≥150ms    | Yes | III | 7.02  | 6.67  |      |      | 1.77 | 1.84 |      |      |
| CRT-D            | 120-150ms | Yes | IV  | 3.37  |       |      |      | 2.21 |      |      |      |
| CRT-D            | ≥150ms    | Yes | IV  | 3.56  | 3.47  | 9.59 | 9.05 | 2.02 | 2.12 | 1.57 | 1.50 |
| IPG <sup>4</sup> | N/A       | N/A | N/A | N/A   |       |      | 8.5  |      |      |      | 1.5  |

---

<sup>4</sup> Brunner M, Olschewski M, Geibel A, Bode C, Zehender M. Long-term Survival After Pacemaker Implantation. Prognostic Importance of Gender and Baseline Patient Characteristics. Eur Heart J. 2004;25:88-95. DOI: 10.1016/j.ehj.2003.10.022

**Table S3. Costs Per Healthcare Utilization by CIED Type** – this is supporting data that is used in the calculations to create the lumped long-term cost assignments, which are detailed in Table ST4.

| <b>CIED Type</b>                                                                                                                                                                                                                                                                                                                                                                                           | <b>HF Hospitalization Cost<sup>5</sup></b> | <b>Annual Device Follow-up Cost*</b> | <b>Device Replacement Cost**</b> | <b>Device Longevity (Years)<sup>6</sup></b> | <b>Annualized Cost of Replacements***</b> | <b>Device Mix<sup>7</sup></b> |
|------------------------------------------------------------------------------------------------------------------------------------------------------------------------------------------------------------------------------------------------------------------------------------------------------------------------------------------------------------------------------------------------------------|--------------------------------------------|--------------------------------------|----------------------------------|---------------------------------------------|-------------------------------------------|-------------------------------|
| ICD                                                                                                                                                                                                                                                                                                                                                                                                        | \$14,631                                   | \$120                                | \$22,889                         | 12.4                                        | \$1,845.87                                | 26.1%                         |
| CRT-P                                                                                                                                                                                                                                                                                                                                                                                                      | \$14,631                                   | \$240                                | \$17,841                         | 10.9                                        | \$1,637                                   | 4.5%                          |
| CRT-D                                                                                                                                                                                                                                                                                                                                                                                                      | \$14,631                                   | \$240                                | \$27,831                         | 8.8                                         | \$3,163                                   | 49.1%                         |
| IPG                                                                                                                                                                                                                                                                                                                                                                                                        | \$14,631                                   | \$60                                 | \$10,184                         | 10.9                                        | \$934                                     | 20.3%                         |
| <p>* Frequency of long-term follow-up estimated at 1x/yr for IPG, 2x/yr for ICD, 4x/yr for CRT-P/D based on coverage and guideline recommendations. Cost of long-term follow-up estimated at \$60/occurrence based on Medicare payment.</p> <p>** Replacement hospital costs derived from average costs in Premier hospital cost database.</p> <p>*** Cost of replacement divided by device longevity.</p> |                                            |                                      |                                  |                                             |                                           |                               |

<sup>5</sup> Kilgore M, Patel HK, Kielhorn A, Maya JF, Sharma P. Economic burden of hospitalizations of Medicare beneficiaries with heart failure. Risk Manag Healthc Policy. 2017;10:63-70. DOI: 10.2147/RMHP.S130341.

<sup>6</sup> Munawar DA, Mahajan R, Linz D, Wong GR, Khokhar KB, Thiyagarajah A, Kadhim K, Emami M, Mishima R, Elliott AD, Middeldorp ME, Roberts-Thompson KC, Young GD, Sanders P, Lau DH. Predicted Longevity of Contemporary Cardiac Implantable Electronic Devices: A Call for Industry-Wide "Standardized" Reporting. Heart Rhythm. 2018;15:1756-1763. DOI: 10.1016/j.hrthm.2018.07.029

<sup>7</sup> Tarakji KG, Mittal S, Kennergren C, Corey R, Poole JE, Schloss E, Gallastegui J, Pickett RA, Evonich R, Philippon F, McComb JM, Roark SF, Sorrentino D, Sholevar D, Cronin E, Berman B, Riggio D, Biffi M, Khan H, Silver MT, Collier J, Eldadah Z, Wright DJ, Lande JD, Lexcen DR, Cheng A, Wilkoff BL; WRAP-IT Investigators. Antibacterial Envelope to Prevent Cardiac Implantable Device Infection. N Engl J Med. 2019;380:1895-1905. DOI: 10.1056/NEJMoa1901111.

**Table S4. Long-Term Lumped Cost and Utility Assignments by CIED Type**

| <b>CIED Type</b> | <b>Discounted Life Expectancy (Years)</b> | <b>Hospitalization Costs</b> | <b>Follow-Up Costs</b> | <b>Replacement Costs</b> | <b>Total Lifetime Costs</b> | <b>Discounted Lifetime Costs</b> |
|------------------|-------------------------------------------|------------------------------|------------------------|--------------------------|-----------------------------|----------------------------------|
| No CIED*         | 6.14                                      | \$24,433                     | \$0                    | \$0                      | \$24,433                    | \$22,015                         |
| ICD              | 9.01                                      | \$22,930                     | \$1,081                | \$16,653                 | \$40,647                    | \$35,159                         |
| CRT-P            | 4.51                                      | \$19,926                     | \$1,081                | \$7,375                  | \$28,383                    | \$26,183                         |
| CRT-D            | 9.05                                      | \$22,015                     | \$2,173                | \$28,633                 | \$52,820                    | \$45,662                         |
| IPG              | 8.50                                      | \$21,947                     | \$510                  | \$7,941                  | \$30,398                    | \$26,485                         |

\* Represents lifetime status of patient who had infection treated with removal and no replacement.

**Table S5. One-Way Sensitivity Analysis Details**

| Scenario                         | Base Case Value | Scenario Value | Description                                             |
|----------------------------------|-----------------|----------------|---------------------------------------------------------|
| Probability of Extraction - Low  | 0.843           | 0.756          |                                                         |
| Probability of Extraction - High | 0.843           | 0.930          |                                                         |
| Infection Disutility - Low       | -0.09           | -0.149         |                                                         |
| Infection Disutility - High      | -0.09           | -0.031         |                                                         |
| Discount Rate - Low              | 3%              | 2%             |                                                         |
| Discount Rate - High             | 3%              | 4%             |                                                         |
| Post-Infection Mortality - Low   | 0.146           | 0.044          | Complete Extraction                                     |
|                                  | 0.238           | 0.190          | Partial Extraction                                      |
|                                  | 0.238           | 0.190          | No Extraction                                           |
| Post-Infection Mortality - High  | 0.146           | 0.248          | Complete Extraction                                     |
|                                  | 0.238           | 0.286          | Partial Extraction                                      |
|                                  | 0.238           | 0.286          | No Extraction                                           |
| Infection Cost - Low             | \$16,592        | \$6,491        | Infection Treatment No Extraction                       |
|                                  | \$67,586        | \$48,108       | Infection treatment partial extraction with replacement |
|                                  | \$45,694        | \$25,524       | Infection treatment full extraction no replacement      |
|                                  | \$67,586        | \$48,108       | Infection treatment full extraction with replacement    |
| Infection Cost - High            | \$16,592        | \$26,693       | Infection Treatment No Extraction                       |
|                                  | \$67,586        | \$87,064       | Infection treatment partial extraction with replacement |
|                                  | \$45,694        | \$65,864       | Infection treatment full extraction no replacement      |
|                                  | \$67,586        | \$87,064       | Infection treatment full extraction with replacement    |
| Life Expectancy - Low            | 7.83            | 6.26           | Discounted Post 12 months, Replacement - CRT-D          |
|                                  | 4.16            | 3.33           | Discounted Post 12 months, Replacement - CRT-P          |
|                                  | 7.41            | 5.93           | Discounted Post 12 months, Replacement - IPG            |



|                        |          |          |                                                   |
|------------------------|----------|----------|---------------------------------------------------|
|                        | 7.80     | 6.24     | Discounted Post 12 months, Replacement - ICD      |
|                        | 5.54     | 4.43     | Discounted Post 12 months, No Replacement - CRT-D |
|                        | 5.54     | 4.43     | Discounted Post 12 months, No Replacement - CRT-P |
|                        | 5.54     | 4.43     | Discounted Post 12 months, No Replacement - IPG   |
|                        | 5.54     | 4.43     | Discounted Post 12 months, No Replacement - ICD   |
| Life Expectancy - High | 7.83     | 9.39     | Discounted Post 12 months, Replacement - CRT-D    |
|                        | 4.16     | 4.99     | Discounted Post 12 months, Replacement - CRT-P    |
|                        | 7.41     | 8.89     | Discounted Post 12 months, Replacement - IPG      |
|                        | 7.80     | 9.35     | Discounted Post 12 months, Replacement - ICD      |
|                        | 5.54     | 6.64     | Discounted Post 12 months, No Replacement - CRT-D |
|                        | 5.54     | 6.64     | Discounted Post 12 months, No Replacement - CRT-P |
|                        | 5.54     | 6.64     | Discounted Post 12 months, No Replacement - IPG   |
|                        | 5.54     | 6.64     | Discounted Post 12 months, No Replacement - ICD   |
| Lifetime Costs - Low   | \$45,662 | \$27,397 | Discounted Lifetime Cost Replacement - CRT-D      |
|                        | \$26,183 | \$15,710 | Discounted Lifetime Cost Replacement - CRT-P      |
|                        | \$26,485 | \$15,891 | Discounted Lifetime Cost Replacement- IPG         |
|                        | \$35,159 | \$21,095 | Discounted Lifetime Cost Replacement - ICD        |
|                        | \$22,015 | \$13,209 | Discounted Lifetime Cost No Replacement - CRT-D   |
|                        | \$22,015 | \$13,209 | Discounted Lifetime Cost No Replacement - CRT-P   |
|                        | \$22,015 | \$13,209 | Discounted Lifetime Cost No Replacement- IPG      |
|                        | \$22,015 | \$13,209 | Discounted Lifetime Cost No Replacement - ICD     |
| Lifetime Costs - High  | \$45,662 | \$63,926 | Discounted Lifetime Cost Replacement - CRT-D      |
|                        | \$26,183 | \$36,657 | Discounted Lifetime Cost Replacement - CRT-P      |
|                        | \$26,485 | \$37,078 | Discounted Lifetime Cost Replacement- IPG         |
|                        | \$35,159 | \$49,222 | Discounted Lifetime Cost Replacement - ICD        |
|                        | \$22,015 | \$30,821 | Discounted Lifetime Cost No Replacement - CRT-D   |
|                        | \$22,015 | \$30,821 | Discounted Lifetime Cost No Replacement - CRT-P   |
|                        | \$22,015 | \$30,821 | Discounted Lifetime Cost No Replacement- IPG      |
|                        | \$22,015 | \$30,821 | Discounted Lifetime Cost No Replacement - ICD     |

**Table S6. Extended One-Way Sensitivity Analysis**

| <b>Parameter</b>                                                                                                                                                                                                                                                                                                                                                                                                                                                                        | <b>Parameter Value</b>  | <b>ICER (per QALY)</b> |
|-----------------------------------------------------------------------------------------------------------------------------------------------------------------------------------------------------------------------------------------------------------------------------------------------------------------------------------------------------------------------------------------------------------------------------------------------------------------------------------------|-------------------------|------------------------|
| Extended Lifetime Cost (Low)                                                                                                                                                                                                                                                                                                                                                                                                                                                            | Lifetime costs halved*  | \$109,900              |
| Extended Lifetime Cost (High)                                                                                                                                                                                                                                                                                                                                                                                                                                                           | Lifetime costs doubled* | \$118,009              |
| TYRX Cost (Low)                                                                                                                                                                                                                                                                                                                                                                                                                                                                         | \$895                   | \$102,824              |
| TYRX Cost (Base Case)                                                                                                                                                                                                                                                                                                                                                                                                                                                                   | \$953                   | \$112,603              |
| TYRX Cost (High)                                                                                                                                                                                                                                                                                                                                                                                                                                                                        | \$995                   | \$119,655              |
| <p>* The calculation of lifetime cost was based on the most appropriate evidence available for this specific patient population. However, we recognize that there is more uncertainty about this input than perhaps any of the others. This extended sensitivity analysis was performed to further demonstrate that the model is not overly sensitive to this input, so that even when these inputs were varied by extreme values the directional result is not markedly different.</p> |                         |                        |
