# Supplementary material for: Cost-Effectiveness of an Antibacterial Envelope for Cardiac Implantable Electronic Device Infection Prevention in the US Healthcare System From the WRAP-IT Trial
Source: PubMed Central journal article supplement — Circ Arrhythm Electrophysiol. 2020 Sep 11;13(10):e008503. doi: 10.1161/CIRCEP.120.008503 (PMC7566304; doi:10.1161/circep.120.008503), 2020-09-11
Supplement: hae-13-e008503-s002.pdf [file hae-13-e008503-s002.pdf]

# Cost-Effectiveness of an Antibacterial Envelope for CIED Infection Prevention in the US Healthcare System from the WRAP-IT Trial

**Running title:** *Wilkoff et al.; Cost-effectiveness of an Antibacterial Envelope*

Bruce L. Wilkoff, MD, FHRS, CCDS<sup>1</sup>; Giuseppe Boriani, MD, PhD<sup>2</sup>; Suneet Mittal, BA, MD, FHRS<sup>3</sup>; Jeanne E. Poole, MD, FHRS, CCDS<sup>4</sup>; Charles Kennergren, MD, PhD, FHRS<sup>5</sup>; Ralph Corey, MD<sup>6</sup>; Andrew D. Krahn, MD<sup>7</sup>; Edward J. Schloss, MD, FHRS<sup>8</sup>; Jose L. Gallastegui, MD<sup>9</sup>; Robert A. Pickett, MD, FHRS<sup>10</sup>; Rudolph F. Evonich, MD, FHRS<sup>11</sup>; Steven F. Roark, MD<sup>12</sup>; Denise M. Sorrentino, MD, FHRS<sup>13</sup>; Darius P. Sholevar, MD, FHRS<sup>14</sup>; Edmond M. Cronin, MBChB, FHRS, CCDS, CEPS-A<sup>15</sup>; Brett J. Berman, MD<sup>16</sup>; David W. Riggio, MD<sup>17</sup>; Hafiza H. Khan, MD, FACC, FHRS<sup>18</sup>; Marc T. Silver, MD, CCDS<sup>19</sup>; Jack Collier, MD<sup>20</sup>; Zayd Eldadah, MD, PhD, FHRS<sup>21</sup>; Reece Holbrook, BSEE<sup>22</sup>; Jeff D. Lande, PhD<sup>22</sup>; Daniel R. Lexcen, PhD<sup>22</sup>; Swathi Seshadri, PhD<sup>22</sup>; Khaldoun G. Tarakji, MD, MPH, FHRS<sup>1</sup>

<sup>1</sup>Cleveland Clinic, Cleveland, OH; <sup>2</sup>University of Modena & Reggio Emilia, Modena, Italy; <sup>3</sup>Valley Health System, Ridgewood, NJ; <sup>4</sup>University of Washington School of Medicine, Seattle, WA; <sup>5</sup>Sahlgrenska University Hospital, Göteborg, Sweden; <sup>6</sup>Duke Clinical Research Institute, Durham, NC; <sup>7</sup>University of British Columbia, BC, Canada; <sup>8</sup>The Christ Hospital, Cincinnati, OH; <sup>9</sup>Clearwater Cardiovascular & Interventional Consultants, Safety Harbor, FL; <sup>10</sup>Saint Thomas Research Institute, LLC, Nashville, TN; <sup>11</sup>Upper Michigan Cardiovascular Associates, Marquette, MI; <sup>12</sup>Cardiology Associates of Gainesville, Gainesville, FL; <sup>13</sup>Iowa Heart Center, Ames, IA; <sup>14</sup>Virtua Health System, Camden, NJ; <sup>15</sup>Temple University Hospital, Philadelphia, PA; <sup>16</sup>Chula Vista Cardiac Center, Chula Vista, CA; <sup>17</sup>Arizona Arrhythmia Consultants, Scottsdale, AZ; <sup>18</sup>Baylor Research Institute, Plano, TX; <sup>19</sup>WakeMed Heart & Vascular, WakeMed Health & Hospitals, Raleigh, NC; <sup>20</sup>Oklahoma Heart Hospital, Oklahoma City, OK; <sup>21</sup>MedStar Heart and Vascular Institute, Washington, DC; <sup>22</sup>Medtronic, Inc. Mounds View, MN

## Correspondence:

Bruce L. Wilkoff, MD, FHRS, CCDS

Cleveland Clinic

9500 Euclid Ave J2-2

Cleveland, OH 44195

Tel: 216-444-1904

E-mail: [wilkoffb@ccf.org](mailto:wilkoffb@ccf.org)

**Journal Subject Terms:** Arrhythmias; Electrophysiology; Pacemaker; Cost-Effectiveness; Treatment

## **Abstract:**

**Background** - In the WRAP-IT trial, adjunctive use of an absorbable antibacterial envelope resulted in a 40% reduction of major cardiac implantable electronic device (CIED) infection without increased risk of complication in 6,983 patients undergoing CIED revision, replacement, upgrade, or initial cardiac resynchronization therapy defibrillator (CRT-D) implant. There is limited information on the cost-effectiveness of this strategy. As a pre-specified objective, we evaluated antibacterial envelope cost-effectiveness compared to standard-of-care infection prevention strategies in the US healthcare system.

**Methods** - A decision tree model was used to compare costs and outcomes of antibacterial envelope (TYRX) use adjunctive to standard-of-care infection prevention vs. standard-of-care alone over a lifelong time horizon. The analysis was performed from an integrated payer-provider network perspective. Infection rates, antibacterial envelope effectiveness, infection treatment costs and patterns, infection-related mortality, and utility estimates were obtained from the WRAP-IT trial. Life expectancy and long-term costs associated with device replacement, follow-up, and healthcare utilization were sourced from the literature. Costs and quality-adjusted life years (QALYs) were discounted at 3%. An upper willingness-to-pay (WTP) threshold of \$150,000 per QALY was used to determine cost-effectiveness, in alignment with American College of Cardiology and American Heart Association (ACC/AHA) practice guidelines and as supported by the World Health Organization (WHO) and contemporary literature.

**Results** - The base-case incremental cost-effectiveness ratio (ICER) of the antibacterial envelope compared to standard-of-care was \$112,603/QALY. The ICER remained lower than the WTP threshold in 74% of iterations in the probabilistic sensitivity analysis and was most sensitive to the following model inputs: infection-related mortality, life expectancy, and infection cost.

**Conclusions** - The absorbable antibacterial envelope was associated with a cost-effectiveness ratio below contemporary benchmarks in the WRAP-IT patient population, suggesting that the envelope provides value for the US healthcare system by reducing the incidence of CIED infection.

**Registration:** Clinicaltrials.gov; Unique Identifier: NCT02277990

**Key words:** pacemaker; implanted cardioverter defibrillator; infection; cost-effectiveness; antibiotic; willingness to treat

## Nonstandard Abbreviations and Acronyms

|         |                                                                     |
|---------|---------------------------------------------------------------------|
| ACC     | American College of Cardiology                                      |
| AHA     | American Heart Association                                          |
| CIED    | Cardiac Implantable Electronic Device                               |
| CRT-D   | Cardiac Resynchronization Therapy Defibrillator                     |
| CRT-P   | Cardiac Resynchronization Therapy Pacemaker                         |
| EHRA    | European Heart Rhythm Association                                   |
| FFS     | Fee-For-Service                                                     |
| GFR     | Glomerular Filtration Rate                                          |
| HP      | High-power (ICD/CRT-D)                                              |
| ICD     | Implantable Cardioverter Defibrillator                              |
| ICER    | Incremental Cost-Effectiveness Ratio                                |
| LP      | Low-power (pacemaker/CRT-P)                                         |
| MS-DRG  | Medicare Severity Diagnosis Related Groups                          |
| NNT     | Number Needed to Treat                                              |
| NYHA    | New York Heart Association                                          |
| PADIT   | Prevention of Arrhythmia Device Infection Trial                     |
| QALY    | Quality Adjusted Life Year                                          |
| QOL     | Quality of Life                                                     |
| TAVR    | Transcatheter Aortic Valve Replacement                              |
| US      | United States                                                       |
| WHO     | World Health Organization                                           |
| WRAP-IT | Worldwide Randomized Antibiotic Envelope Infection Prevention Trial |
| WTP     | Willingness-to-Pay                                                  |

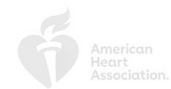

# Prevention of Arrhythmia and Electrophysiology

---

## Introduction

Infection is one of the most serious complications of cardiac implantable electronic device (CIED) therapy, often times requiring prolonged hospitalization and complete device extraction.<sup>1-3</sup> In a recent report based on the global WRAP-IT trial, CIED infections were associated with a greater than three-fold increase in all-cause mortality, a reduction in quality of life (QOL) for 6 months, and a disruption in CIED therapy in 36% of patients.<sup>4</sup> Costs in the US were estimated at \$55K for the hospital, and assuming Medicare fee-for-service (FFS) or Medicare Advantage: \$26K for the payer and \$2.1K for the patient, or \$57K to the payer and

\$1.5K to the patient, respectively. Given the significant clinical and financial burden on patients and the healthcare system, infection prevention is of prime importance.

The WRAP-IT trial was designed to evaluate the safety and efficacy of an antibacterial envelope (TYRX™ absorbable antibacterial envelope, Medtronic, MN, US), and reported a 40% reduction in major CIED infection with antibacterial envelope use, with no increase in procedure- or system-related complications in patients undergoing CIED revision, replacement, upgrade, or initial cardiac resynchronization therapy defibrillator (CRT-D) implant.<sup>5,6</sup> The use of the antibacterial envelope was recently recommended in the 2019 European Heart Rhythm Association (EHRA) International Consensus document, which was endorsed by a number of professional societies/associations comprised of experts in cardiology.<sup>7</sup> This analysis evaluates the cost-effectiveness of the antibiotic envelope in the entire WRAP-IT trial cohort and in defined clinical subsets within the US healthcare system.

## Methods

We adapted a published decision tree model<sup>8</sup> to compare costs and outcomes of antibacterial envelope use (TYRX™ absorbable antibacterial envelope, Medtronic, MN, US) adjunctive to standard-of-care infection prevention strategies vs. standard-of-care alone over a lifelong time horizon. The WRAP-IT trial protocol was approved by the ethics committee at each participating institution and associated national and local regulatory agencies. All patients provided written informed consent. Due to the proprietary nature of the data collected for this trial, data will not be made publicly available.

All analyses were performed from the perspective of an integrated payer-provider entity (e.g. provider-owned health plan), which provides the most comprehensive overview of financial

impact to the hospital and healthcare system. The analysis was performed over the full patient lifetime and used a willingness-to-pay (WTP) threshold of \$150K per quality adjusted life year (QALY) in alignment with American College of Cardiology (ACC)/American Heart Association (AHA) practice guidelines<sup>9</sup> on cost/value methodology and supported by the World Health Organization (WHO)<sup>10</sup> and contemporary literature.<sup>11, 12</sup>

### **Model Structure**

The decision tree model (Figure 1) was developed in Microsoft Excel (Microsoft Corporation, Redmond, WA) to assess the cost-effectiveness of the antibacterial envelope vs. standard-of-care infection prevention alone. Each event following the initial procedure was characterized by a node that occurred with a given probability, and each branch represents a mutually exclusive pathway. Total costs and pay-offs were calculated by summing the product of the pathway probabilities and the corresponding costs and outcomes. The decision tree models events over the 12 months; however, the overall model was extended to a lifetime perspective by assigning lumped cost/benefit estimates at each 12-month endpoint. The structure of the model remains the same for all analyses, only model inputs change.

### **Model Inputs**

Clinical inputs to the model including the standard-of-care infection rate, antibacterial envelope effectiveness, infection treatment costs and patterns, mortality at 12 months, and quality of life (QOL) were based on WRAP-IT trial results.<sup>4, 6</sup> Long-term life expectancy and utilities (single cardinal values between 0 and 1 reflecting the health-related QOL of an individual at a point in time)<sup>13</sup> were derived from prior cost-effectiveness modeling.<sup>14</sup> Hospital costs were used as a surrogate for integrated payer-provider entity costs. Expected lifetime costs for device follow-up, replacement, and healthcare utilization were derived from prior estimates.<sup>14-16</sup> Model input

values for the base case (the primary analysis) and standard errors are included in Table 1, and more detail behind the model inputs are included in the supplemental material (Supplement Tables S1-4).

## **Analysis**

Total lifetime costs and QALYs were simulated to calculate the incremental cost-effectiveness ratio (ICER) for the base case. We conducted one-way sensitivity analyses and a probabilistic sensitivity analysis to assess the impact of model inputs and parameter uncertainty. Cost-effectiveness for sub-groups defined based on known CIED infection risk factors (number of prior procedures, age, depressed renal function, immunocompromised, procedure type)<sup>20</sup> were also calculated by adjusting the standard-of-care infection rate of each sub-group with all other model inputs unchanged. Lifetime costs and QALYs were discounted at a discount rate of 3% for all analyses. All currency reflects 2017 US dollars.

## **Results**

### **Base case analysis**

Table 2 shows the results of the base case analysis. The antibacterial envelope resulted in 8.117 life-years (6.925 QALYs) saved at a cost of \$37,598, while standard-of-care alone resulted in 8.111 life-years (6.919 QALYs) saved at a cost of \$36,929. The ICER of the antibacterial envelope compared to standard-of-care alone was \$112,603/QALY; the antibacterial envelope is cost-effective at a WTP of \$150K.

### **Sensitivity analyses**

Results of the one-way sensitivity analyses show that the ICER was most sensitive to infection-related mortality, life expectancy, and infection cost (Figure 2). Additional parameter values

were considered during the one-way sensitivity analysis (Supplement Table S5); however, the model was not overly sensitive to these values (Supplement Table S6). Figure 3 shows the results of the probabilistic sensitivity analysis, where each dot corresponds to the resulting cost per QALY of a model iteration, and the continuous line shows the WTP threshold of \$150K per QALY. The probabilistic sensitivity analysis found that the ICER remained lower than the WTP threshold in the majority (74%) of iterations.

### **Sub-group analyses**

The following cut-points for levels of cost-effectiveness are calculated from the model by varying the standard-of-care infection rate (while holding all other model inputs constant): the therapy is cost-effective (ICER below the \$150K WTP threshold) when the standard-of-care infection rate is  $\geq 1.0\%$ , is highly cost-effective (ICER below \$50K) when the standard-of-care infection rate is  $\geq 2.0\%$ , and is cost saving when the standard-of-care infection rate is  $\geq 4.0\%$ . The therapy is less economically attractive at standard-of-care infection rates below 1%. See Table 3 for the cost-effectiveness of sub-groups based on known CIED infection risk factors.

---

### **Discussion**

This analysis is the first to leverage randomized controlled trial data to quantify the lifetime impact of using the absorbable antibacterial envelope adjunctive to standard-of-care infection prevention, on healthcare resource use, costs, and patient-centric outcomes in the US healthcare system. We found that when used in patients with an increased risk of CIED infection, the antibacterial envelope has an ICER of \$112,603/QALY compared with standard-of-care alone, which is below the WTP level of \$150K/QALY. This finding is robust to the sensitivity analyses, showing ICERs lower than the WTP with most reasonable variations in model inputs.

An estimated 1.5 million patients worldwide receive a CIED each year.<sup>21</sup> Infections are one of the most feared complications leading to substantial morbidity and three-fold risk of mortality.<sup>4</sup> In spite of best practice, 1-4% of CIED procedures are associated with infection within 12 months,<sup>6, 22-25</sup> and risk accumulates over the lifetime of the patient.<sup>26</sup> The impact of a CIED infection to the healthcare system is substantial, with each event costing \$48,000 to \$55,000 to treat.<sup>1, 25, 27-29</sup> To date, only the TYRX<sup>TM</sup> absorbable antibacterial envelope has been shown to significantly reduce the risk of CIED infection with the addition of pre-operative antibiotics.<sup>6</sup> In addition to the prior finding that the antibacterial envelope is clinically effective, this analysis suggests that the envelope is also cost-effective in the US healthcare system.

When considering the most appropriate perspective for a cost-effectiveness analysis in the US healthcare system, competing incentives between stakeholders (third-party payers, hospitals, clinicians) serve to distort economic analyses from traditional perspectives. For example, from a strict third-party payer perspective there is no reimbursement for the antibacterial envelope, so the use of the antibacterial envelope would result in no cost. From a strict hospital perspective, reimbursement from the payer for the treatment of an infection limits the impact of true costs. Further complicating matters, prior reports have shown significant discrepancies between hospital costs and reimbursement.<sup>4</sup> Such discrepancies are plausible given the mechanism of reimbursement under Medicare Severity Diagnosis Related Groups (MS-DRG). Patients with a CIED infection typically are treated by a hospital admission involving removal of the infected device, a prolonged hospital stay (2-4 weeks) on intravenous antibiotics and temporary device therapy to clear the infection, then a replacement CIED implant. Because of the MS-DRG payment mechanism, the hospitals receive only one payment for the entire inpatient stay. This payment is usually driven by the most expensive procedure performed during



the inpatient stay, which is usually the implant of a new CIED. This means that while the hospital has spent significant resources stabilizing the patient, removing the infected system, and having the patient occupy a bed for several weeks, the hospital is not paid for these costly activities – instead the hospital is paid the same as if the patient had arrived for a *de novo* CIED implant. In order to fairly and comprehensively account for all costs and benefits experienced by the health care ecosystem, this analysis was performed from the perspective of an integrated payer-provider entity, such as a provider-owned health plan.

We believe the integrated entity described above represents the concept of value in healthcare as described by the Porter Model for value in health.<sup>30</sup> It collects all costs and outcomes of the full cycle of care into a single perspective, minimizing conflicting goals; and the ICER is the inverse of the Porter Model definition of value (patient-centric health outcomes achieved per dollar spent). Although not fully aligned with payers and providers that are not part of an integrated system, our findings are aimed to inform the decision-making process at the time of a CIED procedure by accounting for the patient, provider, and payer perspectives.

The tacit WTP for the US healthcare system has been \$50K per QALY. While the origin of this threshold is unclear, it is sometimes attributed to cost-effectiveness analyses of hemodialysis that has its origin approximately 50 years ago.<sup>31</sup> Assuming acceptance of this threshold as a fair benchmark for value at the time, it is reasonable to consider updating it over time at the standard rate of inflation.<sup>32</sup> A simple inflation adjustment of \$50k from 1980 would yield a WTP in 2017 dollars of \$169K per QALY.<sup>33</sup> More recent estimates of the cost-effectiveness of standard, hospital-based hemodialysis for end-stage renal disease are consistent with this rough gauge and range from \$125K-\$150K per QALY.

The above considerations are consistent with those discussed in the 2014 ACC/AHA practice guidelines,<sup>9</sup> US based healthcare value assessment organization statements,<sup>11</sup> and perspectives published in peer-reviewed journals,<sup>12</sup> which generally recommend consideration of \$150K per QALY as a reasonable WTP. Given this understanding, we believe it is reasonable to use a contemporary benchmark of \$150K per QALY, and to further characterize sub-groups that have an ICER below \$50K per QALY as high value, those with an ICER between \$50K-\$150K as intermediate value, and those with an ICER above \$150K as less economically attractive.

The ICER for the antibacterial envelope reported here lies within the range of cost-effectiveness results seen for other cardiovascular therapies. Based on a four-year time horizon, CRT-D therapy had an ICER of \$58K as compared to ICD therapy alone in patients with standard CRT-D indications.<sup>34</sup> The CardioMems™ device was found to have an ICER of \$71K in NYHA Class III patients.<sup>35</sup> The cost-effectiveness of Sacubitril vs. Valsartan in patients with systolic heart failure ranged from \$45 to \$144K in separate estimates.<sup>36, 37</sup> Transcatheter aortic valve replacement (TAVR) had ICER estimates that ranged from \$39,964-\$116,500 when compared to medical management; however, it was considered a disruptive therapy for a population with no other treatment options.<sup>38</sup> TAVR ICER estimates also ranged from \$32,000-\$252,400 when compared to surgical valve replacement in patients with high risk of surgical mortality. At a base case ICER of \$112,603 and the range of ICERs reported for higher risk sub-groups, the antibacterial envelope therapy is commensurate with these other therapies.

To date, there has been little evidence directly addressing the economic implications of using an antibacterial envelope. A report on cost-effectiveness in the United Kingdom healthcare system<sup>8</sup> used a pooled estimate of effectiveness from trials published prior to WRAP-IT. This report found the antibacterial envelope to be cost saving for patients with an ICD or CRT-D

device and cost-effective when baseline probabilities of infection exceeded 1.38-1.95% depending on clinical subset. Given the paucity of such evidence, there have been attempts to use surrogate measures of efficiency, such as number needed to treat (NNT). The NNT that can be calculated directly from the WRAP-IT study is approximately 200, however the NNT cannot be interpreted in isolation from a full consideration of the, benefits, risks, and costs of the therapy, which we take up in the current report. Out of context, the NNT may appear to be a large value, however, the WRAP-IT trial established that there was benefit without increased risk of complications, and this report suggests that the costs are commensurate with the benefits of the envelope.

Different patients present for CIED therapy distinctly, for bradycardia, ventricular arrhythmias and systolic dysfunction. In addition, the pre-procedural comorbidities and the intensity of the CIED procedure distinguish these patients clinically and has an impact on the estimates of cost-effectiveness (Table 3). For example, envelope use in patients who have experienced a prior CIED infection could reasonably be considered high value, while patients with pacemakers and one or fewer prior procedures and no other risk factors could be considered less economically attractive. Recent evidence from the PADIT trial<sup>20, 39</sup> provides a tool to estimate infection risk based on patient-specific factors, which may further inform use of the antibacterial envelope. While the primary finding of this analysis is that the antibacterial envelope is cost-effective in the WRAP-IT trial population, the sub-analyses accounting for patient-specific factors provides some insight into how to assess the use of the antibacterial envelope in these clinical subsets of patients.

It is important to keep this economic analysis in perspective as helpful in broad, policy level decision-making, without applying it as a sole decision criterion in the context of an

individual patient. In particular, there may be patient-level heterogeneity that was not modeled in this analysis. For example, a patient receiving a pacemaker without other risk factors may not appear to warrant envelope use from an economic perspective alone. However, if that patient also had a prosthetic valve, the consequence of a CIED infection may lead to consequences related to the valve as well. Other examples include a patient with a simple generator change with older leads leading to multiple post-infection procedures including lead extractions, a patient with no venous access on the opposite side leading to the need for either a trans-iliac or epicardial system, or a CRT patient where the ability to access the same coronary venous branch after extraction and replacement would be compromised.<sup>40</sup> There is no substitute for clinical judgement in cases that are complicated by factors that are hard to measure, inclusive of potential consequences of infection should it occur.

Our analysis has several limitations that should be acknowledged. Some model inputs were derived from sources outside of the WRAP-IT trial (Table 1); however, data were selected from WRAP-IT whenever available and most inputs did represent an in-trial analysis. Costs and benefits were modeled beyond the directly observed results from the WRAP-IT trial, however the results were robust to the sensitivity analyses. The model did not explicitly account for age-related impacts to utility or healthcare costs; however, the impact of these factors is attenuated by the compound discounting of costs and outcomes over time. The model was particularly sensitive to post-infection mortality with the ICER above the WTP range toward the limit of the sensitivity analysis, however mortality risk after infection has been demonstrated in other analyses.<sup>41, 42</sup> The utilities for patients with and without CIED therapy were modeled independently and may have led to an overestimation of variability of the probabilistic sensitivity analysis, but this is a conservative assumption. Patients from the WRAP-IT trial were not all

from the US, but the clinical application and outcomes of CIED therapy are relatively standardized around the world, and costs were estimated from the US subset of patients. Sub-group analyses were not powered in the original trial and represent hypothesis level evidence only. Infection risk factors used in the sub-group analyses represent clinical factors known prior to the procedure as these are reasonably well established in prior literature, other less well understood risk factors, such as those related to the procedure, could also impact baseline infection risk resulting in directional changes in cost-effectiveness. Patients on chronic oral immunosuppressive agents or on hemodialysis were excluded from the WRAP-IT trial, however, history of immunosuppressive therapy and history of renal dysfunction (GFR <60 ml/min/1.73m<sup>2</sup>) were used as surrogates for the sub-group analysis. The results of this analysis are applicable only to the patient populations that were defined by the WRAP-IT trial inclusion criteria and may not be generalizable to the full CIED procedure population.

### **Conclusion**

The absorbable antibacterial envelope was associated with a cost-effectiveness ratio below contemporary benchmarks in the WRAP-IT patient population, suggesting that the envelope provides value for the US healthcare system by reducing the incidence of CIED infection.

**Acknowledgments:** The authors thank Joanne Krueger, Sara Willey, and Kayce Valerius of Medtronic, Inc. for their management of the WRAP-IT trial and all the trial sites and investigators that contributed to this data set.

**Sources of Funding:** The WRAP-IT trial was supported by Medtronic, Inc.

**Disclosures:** BLW receives honoraria/consultant fees from Abbott, Medtronic, Philips. GB receives honoraria/consultant fees from Boston, Biotronik, Medtronic. SM receives honoraria/consultant fees from Abbott, Boston Scientific, Medtronic. JEP receives

honoraria/consultant fees from Boston Scientific, EBR Solutions, Kestra, Medtronic. CK receives honoraria/consultant fees from Biotronik, Boston Scientific, Medtronic, Philips. RC receives honoraria/consultant fees from Arsanis, Basilea, Bayer, Contrafect, Medtronic, Melinta, Motif, Paratek, Pfizer, Quintiles, Tetrphase, The Medicines Company, Theravance, Bio2 Medical, Cemptra, Meiji Seika Pharm Co., Novella, Regeneron, SC Pharma. EJS and RAP receive honoraria/consultant fees from Boston Scientific, Medtronic. RFE receives honoraria/consultant fees from Abbott, Allergan, Astra Zeneca, Biosense Webster, Boeinger Ingelheim, Boston Scientific, Coherex Medical, CorMatrix Cardiovascular, CVRx, EISAI, EKOS, Eli Lilly, E.R. Squibb & Sons, Hamilton Health Sciences, Janssen Pharmaceuticals, Novartis, Pfizer, Preventice Services, Roxwood Medical, Sanofi-Aventis, SentreHEART, Siemens Medical Solutions, Terumo Medical, Zoll Services. MTS receives honoraria/consultant fees from Medtronic. KGT receives honoraria/consultant fees from AliveCor, Medtronic. ADK receives honoraria/consultant fees from Medtronic. JLG, SFR, DMS, DPS, EMC, BJB, DWR, HHK, JC, ZE receive institutional funding from Medtronic. RH, JL, DL, SS are employment by Medtronic.

## References:

1. Sohail MR, Henrikson CA, Braid-Forbes MJ, Forbes KF, Lerner DJ. Mortality and cost associated with cardiovascular implantable electronic device infections. *Arch Intern Med*. 2011;171:1821-8.
2. Ahmed FZ, Fullwood C, Zaman M, Qamruddin A, Cunnington C, Mamas MA, Sandoe J, Motwani M, Zaidi A. Cardiac implantable electronic device (CIED) infections are expensive and associated with prolonged hospitalisation: UK Retrospective Observational Study. *PLoS One*. 2019;14:e0206611.
3. Essebag V, Verma A, Healey JS, Krahn AD, Kalfon E, Coutu B, Ayala-Paredes F, Tang AS, Sapp J, Sturmer M, et al. Clinically Significant Pocket Hematoma Increases Long-Term Risk of Device Infection: BRUISE CONTROL INFECTION Study. *J Am Coll Cardiol*. 2016;67:1300-8.
4. Wilkoff BL, Boriani G, Mittal S, Poole JE, Kennergren C, Corey GR, Love JC, Augustini R, Faerstrand S, Wiggins SS, et al. Impact of Cardiac Implantable Electronic Device Infection: A Clinical and Economic Analysis of the WRAP-IT Trial. *Circ Arrhythm Electrophysiol*. 2020;13:e008280.

5. Tarakji KG, Mittal S, Kennergren C, Corey R, Poole J, Stromberg K, Lexcen DR, Wilkoff BL. Worldwide Randomized Antibiotic Envelope Infection Prevention Trial (WRAP-IT). *Am Heart J*. 2016;180:12-21.
6. Tarakji KG, Mittal S, Kennergren C, Corey R, Poole JE, Schloss E, Gallastegui J, Pickett RA, Evonich R, Philippon F, et al. Antibacterial Envelope to Prevent Cardiac Implantable Device Infection. *N Engl J Med*. 2019;380:1895-1905.
7. Blomstrom-Lundqvist C, Traykov V, Erba PA, Burri H, Nielsen JC, Bongiorno MG, Poole J, Boriani G, Costa R, Deharo JC, et al. European Heart Rhythm Association (EHRA) international consensus document on how to prevent, diagnose, and treat cardiac implantable electronic device infections-endorsed by the Heart Rhythm Society (HRS), the Asia Pacific Heart Rhythm Society (APHRS), the Latin American Heart Rhythm Society (LAHRS), International Society for Cardiovascular Infectious Diseases (ISCVID) and the European Society of Clinical Microbiology and Infectious Diseases (ESCMID) in collaboration with the European Association for Cardio-Thoracic Surgery (EACTS). *Eur J Cardiothorac Surg*. 2020;57:e1-e31.
8. Kay G, Eby EL, Brown B, Lyon J, Eggington S, Kumar G, Fenwick E, Sohail MR, Wright DJ. Cost-effectiveness of TYRX absorbable antibacterial envelope for prevention of cardiovascular implantable electronic device infection. *J Med Econ*. 2018;21:294-300.
9. Anderson JL, Heidenreich PA, Barnett PG, Creager MA, Fonarow GC, Gibbons RJ, Halperin JL, Hlatky MA, Jacobs AK, Mark DB, et al. ACC/AHA statement on cost/value methodology in clinical practice guidelines and performance measures: a report of the American College of Cardiology/American Heart Association Task Force on Performance Measures and Task Force on Practice Guidelines. *Circulation*. 2014;129:2329-45.
10. Hutubessy R, Chisholm D, Edejer TT. Generalized cost-effectiveness analysis for national-level priority-setting in the health sector. *Cost Eff Resour Alloc*. 2003;1:8.
11. Institute for Clinical and Economic Review. *Overview of the ICER value assessment framework and update for 2017–2019* 2017 Available from: <https://icer-review.org/methodology/icers-methods/icer-value-assessment-framework/> [Accessed August 15, 2019].
12. Neumann PJ, Cohen JT, Weinstein MC. Updating cost-effectiveness--the curious resilience of the \$50,000-per-QALY threshold. *N Engl J Med*. 2014;371:796-7.
13. Torrance GW. Utility approach to measuring health-related quality of life. *J Chronic Dis*. 1987;40:593-603.
14. Mealing S, Woods B, Hawkins N, Cowie MR, Plummer CJ, Abraham WT, Beshai JF, Klein H, Sculpher M. Cost-effectiveness of implantable cardiac devices in patients with systolic heart failure. *Heart*. 2016;102:1742-1749.

15. Kilgore M, Patel HK, Kielhorn A, Maya JF, Sharma P. Economic burden of hospitalizations of Medicare beneficiaries with heart failure. *Risk Manag Healthc Policy*. 2017;10:63-70.
16. Munawar DA, Mahajan R, Linz D, Wong GR, Khokhar KB, Thiyagarajah A, Kadhim K, Emami M, Mishima R, Elliott AD, et al. Predicted longevity of contemporary cardiac implantable electronic devices: A call for industry-wide "standardized" reporting. *Heart Rhythm*. 2018;15:1756-1763.
17. Feldman AM, de Lissovoy G, Bristow MR, Saxon LA, De Marco T, Kass DA, Boehmer J, Singh S, Whellan DJ, Carson P, et al. Cost effectiveness of cardiac resynchronization therapy in the Comparison of Medical Therapy, Pacing, and Defibrillation in Heart Failure (COMPANION) trial. *J Am Coll Cardiol*. 2005;46:2311-21.
18. Udo EO, van Hemel NM, Zuithoff NP, Nijboer H, Taks W, Doevendans PA, Moons KG. Long term quality-of-life in patients with bradycardia pacemaker implantation. *Int J Cardiol*. 2013;168:2159-63.
19. Bundgaard JS, Thune JJ, Nielsen JC, Videbaek R, Haarbo J, Bruun NE, Videbaek L, Aagaard D, Korup E, Jensen G, et al. The impact of implantable cardioverter-defibrillator implantation on health-related quality of life in the DANISH trial. *Europace*. 2019;21:900-908.
20. Birnie DH, Wang J, Alings M, Philippon F, Parkash R, Manlucu J, Angaran P, Rinne C, Coutu B, Low RA, et al. Risk Factors for Infections Involving Cardiac Implanted Electronic Devices. *J Am Coll Cardiol*. 2019;74:2845-2854.
21. Mond HG, Proclemer A. The 11th world survey of cardiac pacing and implantable cardioverter-defibrillators: calendar year 2009--a World Society of Arrhythmia's project. *Pacing Clin Electrophysiol*. 2011;34:1013-27.
22. Tarakji KG, Ellis CR, Defaye P, Kennergren C. Cardiac Implantable Electronic Device Infection in Patients at Risk. *Arrhythm Electrophysiol Rev*. 2016;5:65-71.
23. Greenspon AJ, Patel JD, Lau E, Ochoa JA, Frisch DR, Ho RT, Pavri BB, Kurtz SM. 16-year trends in the infection burden for pacemakers and implantable cardioverter-defibrillators in the United States 1993 to 2008. *J Am Coll Cardiol*. 2011;58:1001-6.
24. Prutkin JM, Reynolds MR, Bao H, Curtis JP, Al-Khatib SM, Aggarwal S, Uslan DZ. Rates of and factors associated with infection in 200 909 Medicare implantable cardioverter-defibrillator implants: results from the National Cardiovascular Data Registry. *Circulation*. 2014;130:1037-43.
25. Eby EL, Bengtson LGS, Johnson MP, Burton ML, Hinnenthal J. Economic impact of cardiac implantable electronic device infections: Cost analysis at one year in a large United States health insurer. *J Med Econ*. 2020:1.



26. Dai M, Cai C, Vaibhav V, Sohail MR, Hayes DL, Hodge DO, Tian Y, Asirvatham R, Cochuyt JJ, Huang C, et al. Trends of Cardiovascular Implantable Electronic Device Infection in 3 Decades: A Population-Based Study. *JACC Clin Electrophysiol*. 2019;5:1071-1080.
27. Greenspon AJ, Eby EL, Petrilla AA, Sohail MR. Treatment patterns, costs, and mortality among Medicare beneficiaries with CIED infection. *Pacing Clin Electrophysiol*. 2018;41:495-503.
28. Sohail MR, Eby EL, Ryan MP, Gunnarsson C, Wright LA, Greenspon AJ. Incidence, Treatment Intensity, and Incremental Annual Expenditures for Patients Experiencing a Cardiac Implantable Electronic Device Infection: Evidence From a Large US Payer Database 1-Year Post Implantation. *Circ Arrhythm Electrophysiol*. 2016;9.
29. Shariff N, Eby E, Adelstein E, Jain S, Shalaby A, Saba S, Wang NC, Schwartzman D. Health and Economic Outcomes Associated with Use of an Antimicrobial Envelope as a Standard of Care for Cardiac Implantable Electronic Device Implantation. *J Cardiovasc Electrophysiol*. 2015;26:783-9.
30. Porter ME. What is value in health care? *N Engl J Med*. 2010;363:2477-81.
31. Grosse SD. Assessing cost-effectiveness in healthcare: history of the \$50,000 per QALY threshold. *Expert Rev Pharmacoecon Outcomes Res*. 2008;8:165-78.
32. Ubel PA, Hirth RA, Chernew ME, Fendrick AM. What is the price of life and why doesn't it increase at the rate of inflation? *Arch Intern Med*. 2003;163:1637-41.
33. \$50,000 in 1979 → 2017 | Inflation Calculator. *Official Inflation Data, Alioth Finance* Available from: <https://www.officialdata.org/1979-dollars-in-2017?amount=50000>.
34. Noyes K, Veazie P, Hall WJ, Zhao H, Buttaccio A, Thevenet-Morrison K, Moss AJ. Cost-effectiveness of cardiac resynchronization therapy in the MADIT-CRT trial. *J Cardiovasc Electrophysiol*. 2013;24:66-74.
35. Sandhu AT, Goldhaber-Fiebert JD, Owens DK, Turakhia MP, Kaiser DW, Heidenreich PA. Cost-Effectiveness of Implantable Pulmonary Artery Pressure Monitoring in Chronic Heart Failure. *JACC Heart Fail*. 2016;4:368-75.
36. Gaziano TA, Fonarow GC, Claggett B, Chan WW, Deschaseaux-Voinet C, Turner SJ, Rouleau JL, Zile MR, McMurray JJ, Solomon SD. Cost-effectiveness Analysis of Sacubitril/Valsartan vs Enalapril in Patients With Heart Failure and Reduced Ejection Fraction. *JAMA Cardiol*. 2016;1:666-72.
37. Zueger PM, Kumar VM, Harrington RL, Rigoni GC, Atwood A, DiDomenico RJ, Touchette DR. Cost-Effectiveness Analysis of Sacubitril/Valsartan for the Treatment of Heart Failure with Reduced Ejection Fraction in the United States. *Pharmacotherapy*. 2018;38:520-530.

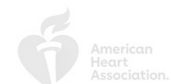

Circulation: Arrhythmia and Electrophysiology

38. Gialama F, Prezerakos P, Apostolopoulos V, Maniadakis N. Systematic review of the cost-effectiveness of transcatheter interventions for valvular heart disease. *Eur Heart J Qual Care Clin Outcomes*. 2018;4:81-90.
39. Krahn AD, Longtin Y, Philippon F, Birnie DH, Manlucu J, Angaran P, Rinne C, Coutu B, Low RA, Essebag V, et al. Prevention of Arrhythmia Device Infection Trial: The PADIT Trial. *J Am Coll Cardiol*. 2018;72:3098-3109.
40. Tarakji KG. Cardiovascular Implantable Electronic Device Infection: Procedure Versus Lifetime Risk. *JACC Clin Electrophysiol*. 2019;5:1081-1083.
41. Tarakji KG, Wazni OM, Harb S, Hsu A, Saliba W, Wilkoff BL. Risk factors for 1-year mortality among patients with cardiac implantable electronic device infection undergoing transvenous lead extraction: the impact of the infection type and the presence of vegetation on survival. *Europace*. 2014;16:1490-5.
42. Sohail MR, Henrikson CA, Jo Braid-Forbes M, Forbes KF, Lerner DJ. Increased long-term mortality in patients with cardiovascular implantable electronic device infections. *Pacing Clin Electrophysiol*. 2015;38:231-9.

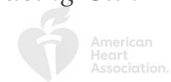

# Circulation: Arrhythmia and Electrophysiology

---

**Table 1.** Detailed Model Inputs

| Model Parameter                                                                                                                                                                                         | Base Case Value                                          | Standard Error                                      | Source                                                                                                                     |
|---------------------------------------------------------------------------------------------------------------------------------------------------------------------------------------------------------|----------------------------------------------------------|-----------------------------------------------------|----------------------------------------------------------------------------------------------------------------------------|
| Baseline Infection Rate                                                                                                                                                                                 | 1.2%                                                     | 0.18%                                               | WRAP-IT                                                                                                                    |
| TYRX Effectiveness                                                                                                                                                                                      | 0.6                                                      | 0.15                                                | WRAP-IT                                                                                                                    |
| TYRX Cost                                                                                                                                                                                               | \$953                                                    | N/A                                                 | Medtronic                                                                                                                  |
| Infection Treatment Cost <ul style="list-style-type: none"> <li>No extraction</li> <li>Full extraction no replacement</li> <li>Extraction with replacement</li> </ul>                                   | \$16,592<br>\$45,694<br>\$67,586                         | \$5,050<br>\$10,085<br>\$9,739                      | WRAP-IT                                                                                                                    |
| Infection-Related Utility (QOL)                                                                                                                                                                         | -0.09                                                    | 0.03                                                | WRAP-IT                                                                                                                    |
| Mortality at 12 Months <ul style="list-style-type: none"> <li>No infection</li> <li>Infection, no extraction</li> <li>Infection, partial extraction</li> <li>Infection, complete extraction</li> </ul>  | 5.2%<br>23.8%<br>23.8%<br>14.6%                          | 0.3%<br>2.4%<br>2.4%<br>5.1%                        | WRAP-IT                                                                                                                    |
| Life Expectancy (discounted years) <ul style="list-style-type: none"> <li>No CIED</li> <li>Pacemaker</li> <li>ICD</li> <li>CRT-P</li> <li>CRT-D</li> </ul>                                              | 5.5<br>7.4<br>7.8<br>4.2<br>7.8                          | 0.55<br>0.74<br>0.78<br>0.42<br>0.78                | <br>Mealing et al. (2016) <sup>14</sup> |
| Long-term Utility with CIED (QOL) <ul style="list-style-type: none"> <li>Pacemaker</li> <li>ICD</li> <li>CRT-P</li> <li>CRT-D</li> </ul>                                                                | 0.841<br>0.870<br>0.842<br>0.850                         | 0.0044<br>0.0048<br>0.0102<br>0.0033                | WRAP-IT                                                                                                                    |
| Long-term Utility without CIED (QOL) <ul style="list-style-type: none"> <li>Pacemaker (not replaced)</li> <li>ICD (not replaced)</li> <li>CRT-P (not replaced)</li> <li>CRT-D (not replaced)</li> </ul> | 0.771<br>0.870<br>0.661<br>0.662                         | 0.08<br>0.09<br>0.07<br>0.07                        | Feldman et al. (2005) <sup>17</sup><br>Udo et al. (2013) <sup>18</sup><br>Bundgaard et al. (2019) <sup>19</sup>            |
| Lifetime Costs (discounted) <ul style="list-style-type: none"> <li>No CIED</li> <li>Pacemaker</li> <li>ICD</li> <li>CRT-P</li> <li>CRT-D</li> </ul>                                                     | \$22,015<br>\$26,485<br>\$35,159<br>\$26,183<br>\$45,662 | \$4,403<br>\$5,297<br>\$7,032<br>\$5,237<br>\$9,132 | Mealing et al. (2016) <sup>14</sup><br>Kilgore et al. (2017) <sup>15</sup><br>Munawar et al. (2018) <sup>16</sup>          |

CIED, cardiac implantable electronic device; CRT-P/D, cardiac resynchronization therapy pacemaker/defibrillator; ICD, implantable cardioverter defibrillator; QOL, quality of life

**Table 2.** Base Case Analysis Results

|                         | Standard-of-Care Alone | Antibacterial Envelope |
|-------------------------|------------------------|------------------------|
| Costs through 12 Months | \$842                  | \$1,479                |
| Costs after 12 months   | \$36,087               | \$36,119               |
| Total Lifetime Costs    | \$36,929               | \$37,598               |
| Cost difference (US \$) | \$669                  |                        |
| Life-years saved        | 8.111                  | 8.117                  |
| Life-years difference   | 0.006                  |                        |
| QALY saved              | 6.919                  | 6.925                  |
| QALY difference         | 0.006                  |                        |
| ICER                    | \$112,603              |                        |

ICER, Incremental Cost Effectiveness Ratio; QALY, quality-adjusted life years

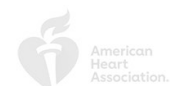**Table 3.** Cost-Effectiveness of Sub-groups

| Sub-group                     | WRAP-IT Standard-of-Care Infection Rate | ICER (per QALY) | Level of Value               |
|-------------------------------|-----------------------------------------|-----------------|------------------------------|
| Prior CIED Infection          | 5.8%                                    | Dominant        | Cost Saving                  |
| Hx Immunocompromised          | 4.0%                                    | \$312           | High Value                   |
| HP: ≥2 Prior Procedures       | 2.4%                                    | \$32,396        | High Value                   |
| LP: Revision/Upgrade          | 2.4%                                    | \$32,396        | High Value                   |
| Hx Renal Dysfunction          | 1.7%                                    | \$65,422        | Intermediate Value           |
| HP: Revision/Upgrade          | 1.5%                                    | \$80,520        | Intermediate Value           |
| LP: ≥2 Prior Procedures       | 1.1%                                    | \$127,186       | Intermediate Value           |
| HP: =1 Prior Procedure        | 1.0%                                    | \$144,686       | Intermediate Value           |
| LP: =1 Prior Procedure        | 0.9%                                    | \$166,074       | Less Economically Attractive |
| CRT-D: <i>de novo</i> Implant | 0.5%                                    | \$337,184       | Less Economically Attractive |

Cost Saving = antibacterial envelope results in lower cost compared to standard-of-care alone. Renal dysfunction is defined as GFR <60 ml/min/1.73m<sup>2</sup>. Prior procedures is inclusive of all procedures including *de novo* implant.

CIED, cardiac implantable electronic device; CRT-D, cardiac resynchronization therapy defibrillator; HP, high-power device (ICD or CRT-D); Hx, history; ICD, implantable cardiac defibrillator; LP, low-power device (pacemaker or CRT-P)

## Figure Legends:

**Figure 1.** Decision Tree Analysis. The decision tree model was developed in Microsoft Excel (Microsoft Corporation, Redmond, WA, US). Each event following the initial procedure was characterized by a node that occurred with a given probability, and each branch represents a mutually exclusive pathway. The total costs and pay-offs associated with either treatment option was calculated by multiplying the pathway probabilities by the corresponding costs and outcomes and summing the expected costs and pay-offs. The decision tree time horizon is 12 months and the model is extended to a lifetime perspective by assigning lumped cost/benefit estimates at endpoints A-H. CIED = cardiac implantable electronic device.



**Figure 2.** One-way Sensitivity Analysis. Tornado chart of the range of ICER across high and low parameter input values (input values are available in Table ST5 of the supplement). Each input was varied with all others held constant. ICER values remained below the \$150K WTP benchmark for the majority of input variations. ICER = incremental cost-effectiveness ratio; WTP = willingness-to-pay.

**Figure 3.** Probabilistic Sensitivity Analysis. The scatterplot depicts the range of ICER given probabilistic variation in model inputs. Blue dots represent individual ICER data points, while the red dot represents the mean ICER from the probabilistic datapoints. The dashed line represents the WTP benchmark. The ICER remained lower than the WTP in the majority (74%) of iterations. ICER = incremental cost-effectiveness ratio; WTP = willingness-to-pay; QALY = quality adjusted life year.

## What Is Known?

- Infection is one of the most serious complications of cardiac implantable electronic device (CIED) therapy, often requiring prolonged hospitalization and complete device extraction until the infection is resolved.
- Impacts of CIED infection include increased risk of mortality, reduced quality of life (QOL), disruptions in CIED therapy, and significant costs to payers, hospitals, and patients.
- In the WRAP-IT trial, adjunctive use of an absorbable antibacterial envelope (TYRX™) resulted in a 40% reduction of major CIED infection without increased risk of complication in 6,983 patients undergoing CIED revision, replacement, upgrade, or initial CRT-D implant.

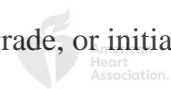

## What the Study Adds?

- This analysis is the first to leverage randomized controlled trial data to quantify the lifetime impact of using the absorbable antibacterial envelope adjunctive to standard-of-care infection prevention, on healthcare resource use, costs, and patient-centric outcomes in the US healthcare system.
- The absorbable antibacterial envelope was associated with a cost-effectiveness ratio below contemporary benchmarks in the WRAP-IT patient population, from the perspective of an integrated payer-provider network.

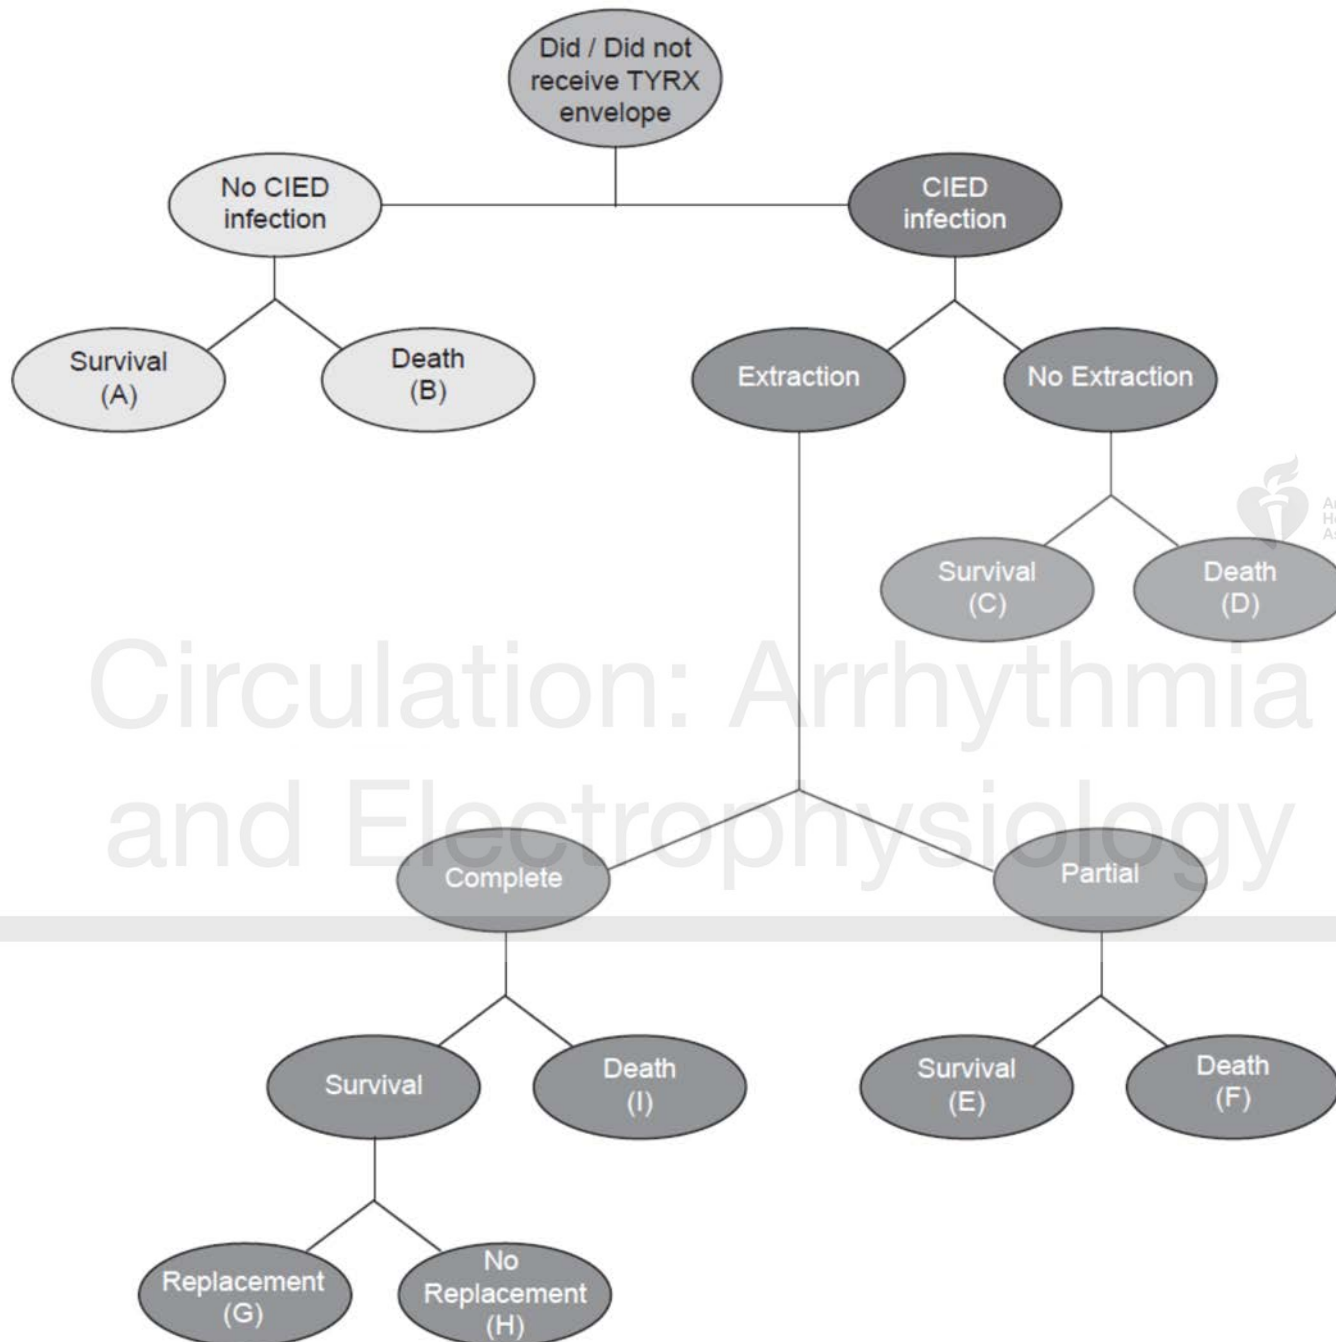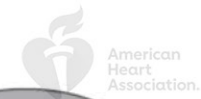

# Circulation: Arrhythmia and Electrophysiology

# One-Way Sensitivity Analysis

■ High Input ■ Low Input

Post-Infection Mortality

Life Expectancy

Infection Cost

Discount Rate

Infection Disutility

Lifetime Costs

Extraction Probability

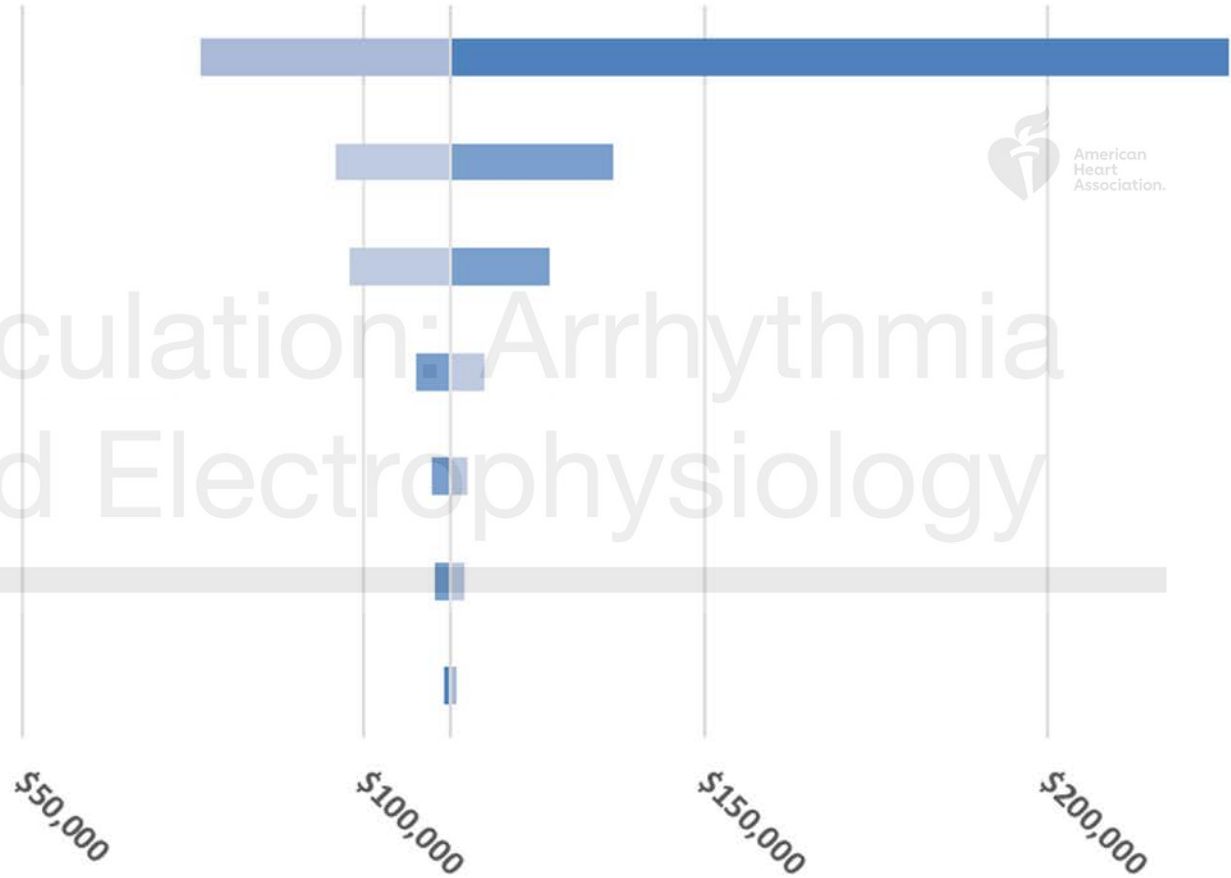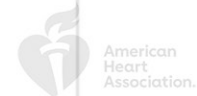

Circulation: Arrhythmia and Electrophysiology



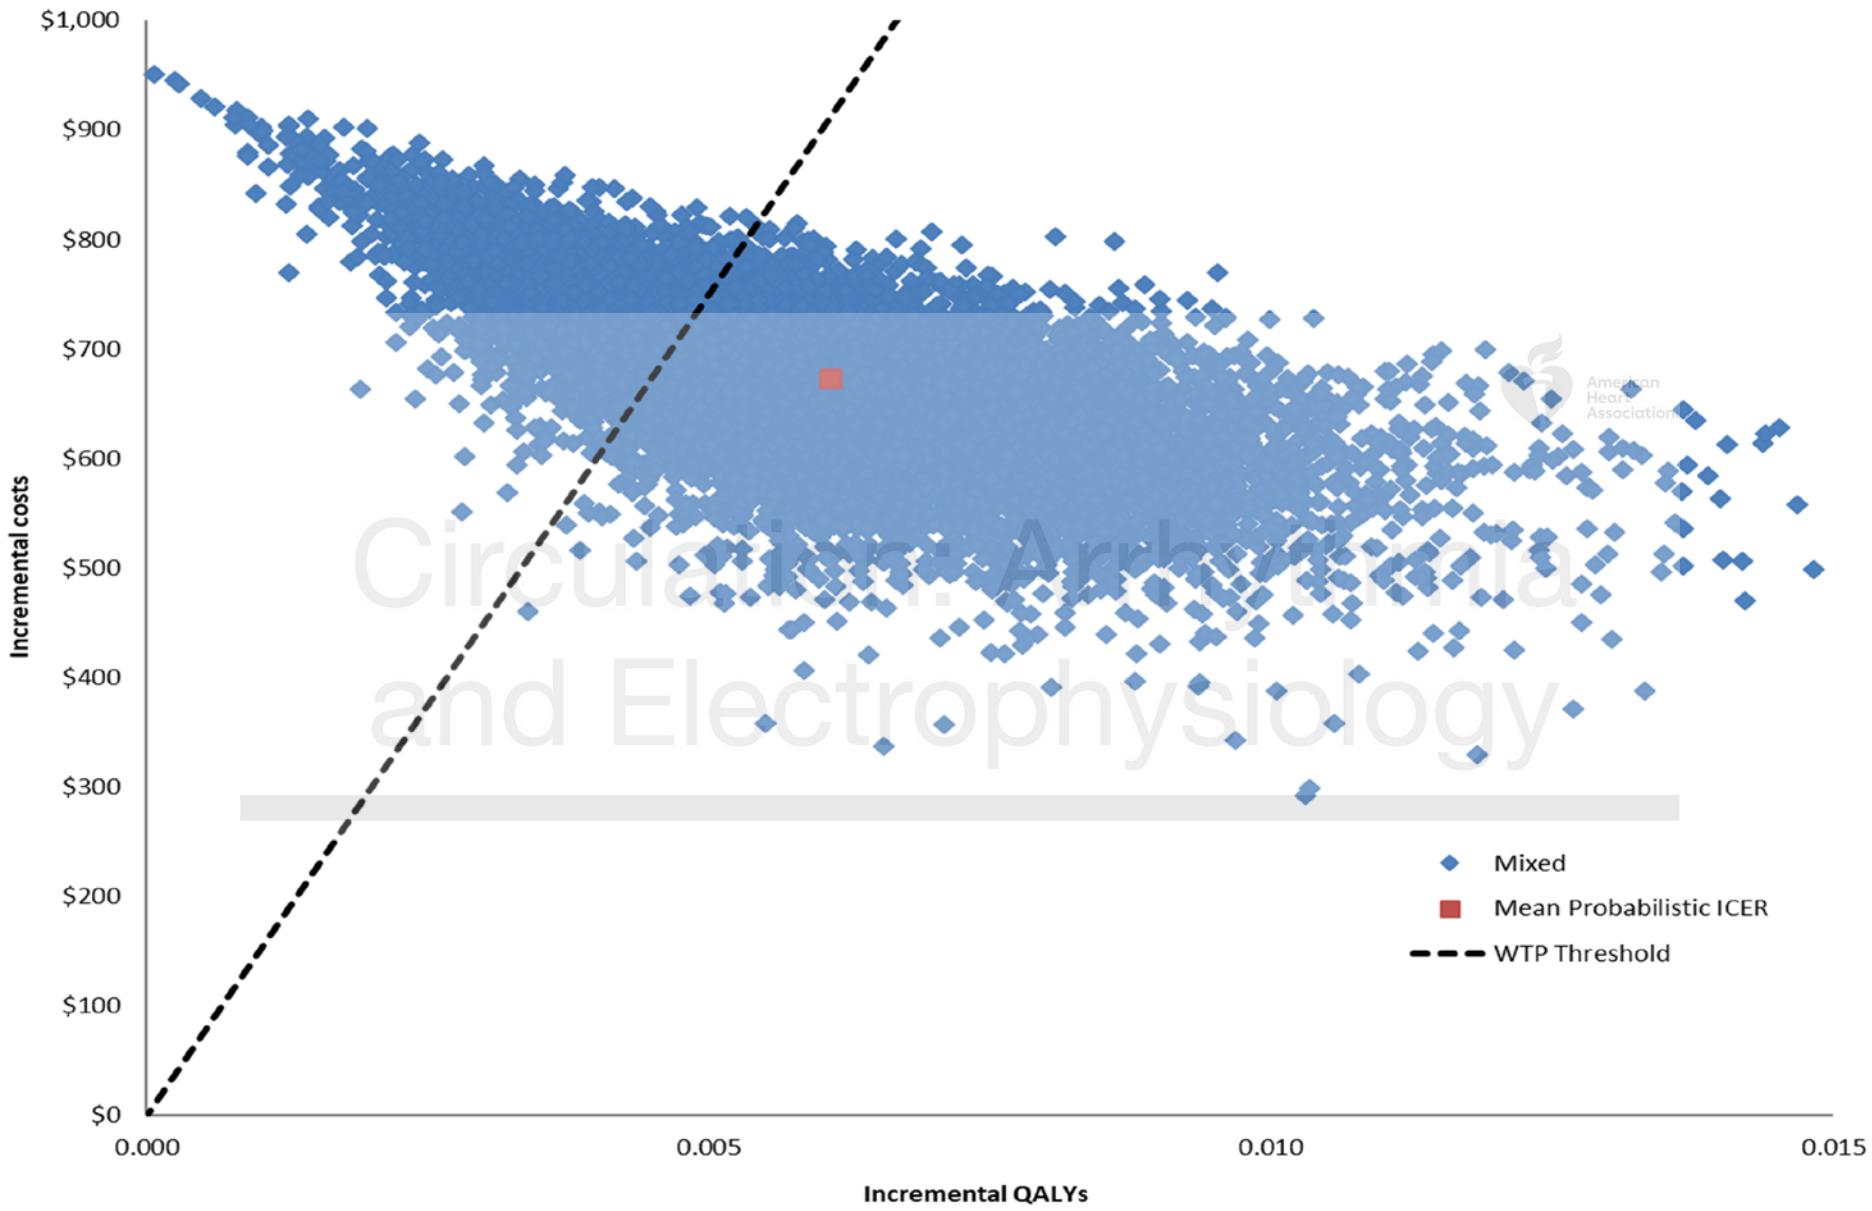

# COST-EFFECTIVENESS OF AN ANTIBACTERIAL ENVELOPE

## A PRE-SPECIFIED ANALYSIS OF THE WRAP-IT TRIAL

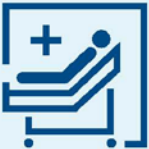

### CIED INFECTIONS

#### Outcomes, Costs Per Infection

- >3X mortality risk at 1 year
- Suppressed quality of life for 6 months
- \$55,000 avg hospital cost to treat

#### Envelope Effectiveness

- 40% reduction of major CIED infections with TYRX

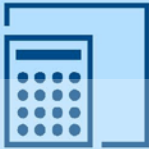

### ANALYSIS METHODS

#### Model

- Value defined as dollars spent to achieve health outcome
- Integrated payer-provider perspective
- Decision tree based on costs and outcomes from the WRAP-IT Trial

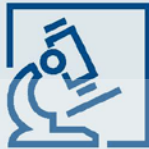

### ECONOMIC RESULTS

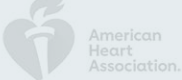

#### Cost-Effectiveness Ratio

- \$112,000 per quality adjusted life-year

#### Willingness-to-pay Threshold

- \$150,000 per QALY, aligned with ACC/AHA practice guideline recommendations

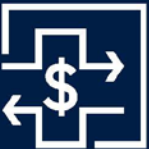

### CONCLUSION

The TYRX absorbable antibacterial envelope was associated with a cost-effectiveness ratio below contemporary benchmarks in the WRAP-IT patient population, suggesting that the envelope provides value for the US healthcare system.
