# Supplementary material for: Cost-Effectiveness of an Antibacterial Envelope for Cardiac Implantable Electronic Device Infection Prevention in the US Healthcare System From the WRAP-IT Trial
Source: PubMed Central journal article supplement — Circ Arrhythm Electrophysiol. 2020 Sep 11;13(10):e008503. doi: 10.1161/CIRCEP.120.008503 (PMC7566304; doi:10.1161/circep.120.008503), 2020-09-11
Supplement: hae-13-e008503-s003.pdf [file hae-13-e008503-s003.pdf]

# COST-EFFECTIVENESS OF AN ANTIBACTERIAL ENVELOPE

## A PRE-SPECIFIED ANALYSIS OF THE WRAP-IT TRIAL

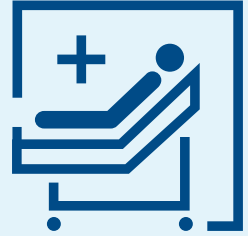

### CIED INFECTIONS

#### Outcomes, Costs Per Infection

- >3X mortality risk at 1 year
- Suppressed quality of life for 6 months
- \$55,000 avg hospital cost to treat

#### Envelope Effectiveness

- 40% reduction of major CIED infections with TYRX

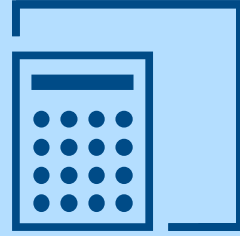

### ANALYSIS METHODS

#### Model

- Value defined as dollars spent to achieve health outcome
- Integrated payer-provider perspective
- Decision tree based on costs and outcomes from the WRAP-IT Trial

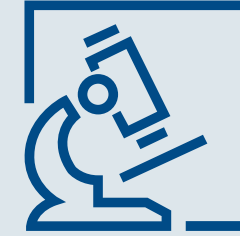

### ECONOMIC RESULTS

#### Cost-Effectiveness Ratio

- \$112,000 per quality adjusted life-year

#### Willingness-to-pay Threshold

- \$150,000 per QALY, aligned with ACC/AHA practice guideline recommendations

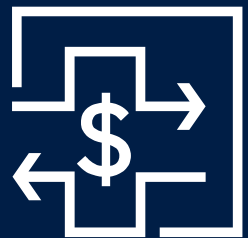

### CONCLUSION

The TYRX absorbable antibacterial envelope was associated with a cost-effectiveness ratio below contemporary benchmarks in the WRAP-IT patient population, suggesting that the envelope provides value for the US healthcare system.
